# Supplementary material for: Extensive Differences in Antifungal Immune Response in TwoDrosophilaSpecies Revealed by Comparative Transcriptome Analysis
Source: Hindawi journal article supplement (doi:10.1155/2013/542139), 2013-01-01

Supplementary Table 1: Number of reads, trimmed mean of M value (TMM) and induction coefficient (IC) for endogenous control genes in *D. virilis* and *D. melanogaster*.

| Organism               | Symbol | Gene    | Infected     |       | Naïve        |       | IC    |
|------------------------|--------|---------|--------------|-------|--------------|-------|-------|
|                        |        |         | No. of reads | TMM   | No. of reads | TMM   |       |
| <i>D. virilis</i>      | RpL32  | RpL32   | 38           | 1.156 | 31           | 0.884 | 1.307 |
|                        | Gapdh  | GJ20812 | 0            | 0     | 2            | 0.022 | 0     |
|                        |        | GJ20492 | 27           | 0.333 | 36           | 0.416 | 0.800 |
| <i>D. melanogaster</i> | RpL32  | RpL32   | 71           | 2.216 | 87           | 3.073 | 0.721 |
|                        | Gapdh  | Gapdh1  | 27           | 0.351 | 40           | 0.589 | 0.597 |
|                        |        | Gapdh2  | 11           | 0.134 | 21           | 0.289 | 0.463 |

Supplementary Table 2: Number of reads, trimmed mean of M value (TMM) and induction coefficient (IC) for recognition, signaling and effector class immune-related genes observed in *D. virilis*.

| <i>D. virilis</i> gene | <i>D. melanogaster</i> homologue | Infected    |       | Naïve       |       | IC       | Functional Class | Notes                      |
|------------------------|----------------------------------|-------------|-------|-------------|-------|----------|------------------|----------------------------|
|                        |                                  | No of reads | TMM   | No of reads | TMM   |          |                  |                            |
| GJ20666                | CG13422                          | 6 *         | 0.153 | 0           | 0     | Infinity | Recognition      | Beta-glucan binding domain |
| GJ18161                | nimB5                            | 5           | 0.070 | 0           | 0     | Infinity | Recognition      | Nimrod-related             |
| GJ22101                | Corin                            | 1           | 0.003 | 0           | 0     | Infinity | Recognition      | Scavenger receptor         |
| GJ11092                | modSP                            | 1           | 0.009 | 0           | 0     | Infinity | Recognition      | Scavenger receptor         |
| GJ12160                | PGRP-SB1                         | 11 *        | 0.235 | 2           | 0.040 | 5.864    | Recognition      | PGRP domain                |
| GJ20388                | Mcr                              | 4           | 0.009 | 1           | 0.002 | 4.265    | Recognition      | Tep                        |
| GJ13216                | modSP                            | 10          | 0.073 | 5           | 0.034 | 2.132    | Recognition      | Scavenger receptor         |
| GJ19730                | crq                              | 2           | 0.017 | 1           | 0.008 | 2.132    | Recognition      | Scavenger receptor         |
| GJ15950                | PGRP-SA                          | 10          | 0.208 | 7           | 0.137 | 1.523    | Recognition      | PGRP domain                |
| GJ16225                | TepII                            | 28          | 0.082 | 26          | 0.071 | 1.148    | Recognition      | Tep                        |
| GJ13386                | PGRP-LF                          | 2           | 0.022 | 2           | 0.021 | 1.066    | Recognition      | PGRP domain                |
| GJ13383                | PGRP-LC                          | 7           | 0.054 | 8           | 0.058 | 0.933    | Recognition      | PGRP domain                |
| GJ18075                | nimB2                            | 29          | 0.298 | 36          | 0.347 | 0.859    | Recognition      | Nimrod-related             |
| GJ18565                | PGRP-LE                          | 3           | 0.034 | 4           | 0.042 | 0.800    | Recognition      | PGRP domain                |
| GJ18162                | nimC2                            | 11          | 0.063 | 15          | 0.081 | 0.78     | Recognition      | Nimrod-related             |
| GJ17482                | pes                              | 2           | 0.015 | 3           | 0.021 | 0.71     | Recognition      | Scavenger receptor         |
| GJ14102                | GNBP2                            | 5           | 0.149 | 8           | 0.223 | 0.666    | Recognition      | Beta-glucan binding domain |
| GJ13082                | GNBP3                            | 6           | 0.050 | 10          | 0.078 | 0.640    | Recognition      | Beta-glucan binding domain |
| GJ23926                | modSP                            | 4           | 0.026 | 7           | 0.042 | 0.609    | Recognition      | Scavenger receptor         |
| GJ18229                | TepIV                            | 29          | 0.081 | 54          | 0.141 | 0.573    | Recognition      | Tep                        |
| GJ21683                | CG30148                          | 7           | 0.230 | 14          | 0.431 | 0.533    | Recognition      | Beta-glucan binding domain |
| GJ18073                | nimB4                            | 1           | 0.009 | 3           | 0.025 | 0.355    | Recognition      | Nimrod-related             |

Supplementary Table 2 continued

|         |             |       |       |    |       |          |             |                           |
|---------|-------------|-------|-------|----|-------|----------|-------------|---------------------------|
| GJ18074 | nimB3       | 2 *   | 0.067 | 12 | 0.376 | 0.178    | Recognition | Nimrod-related            |
| GJ11132 | r2d2        | 3     | 0.039 | 1  | 0.012 | 3.198    | Other       | .                         |
| GJ20897 | Dcr-2       | 4     | 0.010 | 5  | 0.011 | 0.853    | Other       | .                         |
| GJ15620 | et          | 5     | 0.028 | 0  | 0     | Infinity | Signaling   | .                         |
| GJ18697 | Ulp1        | 5     | 0.023 | 0  | 0     | Infinity | Signaling   | Protein modification      |
| GJ21884 | bsk         | 2     | 0.022 | 0  | 0     | Infinity | Signaling   | Kinase                    |
| GJ16598 | phl         | 2     | 0.011 | 0  | 0     | Infinity | Signaling   | .                         |
| GJ20084 | casp        | 1     | 0.034 | 0  | 0     | Infinity | Signaling   | Negative regulator of imd |
| GJ21215 | grass       | 1     | 0.027 | 0  | 0     | Infinity | Signaling   | Protease                  |
| GJ21265 | her         | 1     | 0.012 | 0  | 0     | Infinity | Signaling   | Transcription factor      |
| GJ16702 | Dredd       | 1     | 0.008 | 0  | 0     | Infinity | Signaling   | Protease                  |
| GJ16121 | Traf4       | 1     | 0.008 | 0  | 0     | Infinity | Signaling   | .                         |
| GJ20901 | Iap2        | 1     | 0.008 | 0  | 0     | Infinity | Signaling   | .                         |
| GJ14961 | Su(var)2-10 | 1     | 0.007 | 0  | 0     | Infinity | Signaling   | .                         |
| GJ24520 | ea          | 1     | 0.005 | 0  | 0     | Infinity | Signaling   | Protease                  |
| GJ23176 | Ser         | 1     | 0.003 | 0  | 0     | Infinity | Signaling   | Ligand                    |
| GJ12373 | msn         | 9 *   | 0.024 | 1  | 0.002 | 9.595    | Signaling   | Kinase                    |
| GJ20603 | Pvr         | 15 ** | 0.038 | 2  | 0.005 | 7.996    | Signaling   | Receptor                  |
| GJ23773 | Hel89B      | 5     | 0.011 | 1  | 0.002 | 5.331    | Signaling   | .                         |
| tub     | tub         | 7     | 0.055 | 2  | 0.015 | 3.732    | Signaling   | .                         |
| GJ20044 | dom         | 10    | 0.013 | 3  | 0.004 | 3.554    | Signaling   | Transcription factor      |
| Ras1    | Ras85D      | 3     | 0.065 | 1  | 0.020 | 3.198    | Signaling   | .                         |
| GJ20758 | Nup214      | 3     | 0.007 | 1  | 0.002 | 3.198    | Signaling   | Nuclear transport         |
| GJ16165 | Pvf2        | 5     | 0.055 | 2  | 0.020 | 2.665    | Signaling   | Ligand                    |
| GJ21092 | Myd88       | 5     | 0.044 | 2  | 0.017 | 2.665    | Signaling   | .                         |

*Supplementary Table 2 continued*

---

|         |         |    |       |   |       |       |           |                                  |
|---------|---------|----|-------|---|-------|-------|-----------|----------------------------------|
| GJ18227 | ref(2)P | 18 | 0.113 | 9 | 0.053 | 2.132 | Signaling | .                                |
| GJ11038 | Mkk4    | 4  | 0.038 | 2 | 0.018 | 2.132 | Signaling | Kinase                           |
| GJ18559 | smt3    | 2  | 0.080 | 1 | 0.038 | 2.132 | Signaling | Protein modification             |
| GJ10528 | mask    | 16 | 0.016 | 9 | 0.008 | 1.895 | Signaling | .                                |
| GJ12202 | Uev1A   | 7  | 0.197 | 4 | 0.105 | 1.866 | Signaling | Protein modification             |
| GJ19711 | lwr     | 5  | 0.128 | 3 | 0.072 | 1.777 | Signaling | Protein modification             |
| GJ24191 | Stat92E | 13 | 0.069 | 8 | 0.040 | 1.733 | Signaling | Transcription factor             |
| GJ17162 | cact    | 8  | 0.059 | 5 | 0.035 | 1.706 | Signaling | .                                |
| GJ19035 | ben     | 3  | 0.081 | 2 | 0.051 | 1.599 | Signaling | Protein modification             |
| GJ16904 | hep     | 4  | 0.012 | 3 | 0.009 | 1.422 | Signaling | Kinase                           |
| GJ23481 | Rel     | 7  | 0.030 | 6 | 0.024 | 1.244 | Signaling | Transcription factor             |
| GJ22783 | SPE     | 7  | 0.071 | 7 | 0.067 | 1.066 | Signaling | Protease                         |
| GJ10450 | cher    | 6  | 0.024 | 6 | 0.022 | 1.066 | Signaling | .                                |
| GJ16233 | Dif     | 4  | 0.027 | 4 | 0.025 | 1.066 | Signaling | Transcription factor             |
| GJ10642 | Kay     | 3  | 0.016 | 3 | 0.015 | 1.066 | Signaling | Transcription factor             |
| GJ21432 | POSH    | 3  | 0.014 | 3 | 0.013 | 1.066 | Signaling | .                                |
| GJ22384 | Jra     | 2  | 0.028 | 2 | 0.026 | 1.066 | Signaling | Transcription factor             |
| GJ13209 | Rac1    | 1  | 0.021 | 1 | 0.020 | 1.066 | Signaling | .                                |
| GJ12360 | Rac2    | 1  | 0.021 | 1 | 0.020 | 1.066 | Signaling | .                                |
| GJ21078 | key     | 1  | 0.010 | 1 | 0.010 | 1.066 | Signaling | Kinase                           |
| GJ20083 | casp    | 1  | 0.008 | 1 | 0.007 | 1.066 | Signaling | Negative regulator of imd        |
| GJ10286 | Socs36E | 1  | 0.006 | 1 | 0.006 | 1.066 | Signaling | Negative regulator of<br>JAKSTAT |
| GJ24058 | mbo     | 1  | 0.006 | 1 | 0.005 | 1.066 | Signaling | Nuclear transport                |
| GJ15619 | dome    | 1  | 0.003 | 1 | 0.003 | 1.066 | Signaling | Receptor                         |

---

Supplementary Table 2 continued

|         |        |       |       |    |       |          |           |                       |
|---------|--------|-------|-------|----|-------|----------|-----------|-----------------------|
| GJ15330 | hop    | 1     | 0.003 | 1  | 0.003 | 1.066    | Signaling | Kinase                |
| GJ20945 | 18w    | 1     | 0.003 | 1  | 0.003 | 1.066    | Signaling | Toll-like             |
| GJ10951 | Sp7    | 35    | 0.371 | 40 | 0.398 | 0.933    | Signaling | Phenoloxidase cascade |
| GJ20054 | Egfr   | 5     | 0.014 | 6  | 0.016 | 0.888    | Signaling | Receptor              |
| GJ14938 | nec    | 16    | 0.126 | 20 | 0.148 | 0.853    | Signaling | Protease              |
| GJ18893 | Pvf1   | 3     | 0.038 | 4  | 0.047 | 0.800    | Signaling | Ligand                |
| GJ21412 | Spn27A | 5     | 0.046 | 7  | 0.061 | 0.762    | Signaling | Phenoloxidase cascade |
| GJ20786 | Stam   | 7     | 0.040 | 10 | 0.053 | 0.746    | Signaling | .                     |
| GJ18599 | Ntf-2  | 2     | 0.063 | 3  | 0.088 | 0.711    | Signaling | Nuclear transport     |
| GJ14460 | MP1    | 14    | 0.145 | 22 | 0.213 | 0.678    | Signaling | Phenoloxidase cascade |
| GJ23376 | srp    | 10    | 0.033 | 16 | 0.050 | 0.666    | Signaling | Transcription factor  |
| GJ10449 | cher   | 6     | 0.017 | 10 | 0.027 | 0.640    | Signaling | .                     |
| GJ15197 | psh    | 14    | 0.145 | 25 | 0.242 | 0.597    | Signaling | Protease              |
| GJ11780 | brm    | 5     | 0.012 | 9  | 0.021 | 0.592    | Signaling | Transcription factor  |
| GJ23435 | ben    | 1     | 0.027 | 2  | 0.051 | 0.533    | Signaling | Protein modification  |
| GJ18753 | slpr   | 1     | 0.003 | 2  | 0.006 | 0.533    | Signaling | .                     |
| GJ17781 | ush    | 4     | 0.011 | 10 | 0.026 | 0.426    | Signaling | Transcription factor  |
| GJ21441 | smt3   | 1     | 0.045 | 3  | 0.127 | 0.355    | Signaling | Protein modification  |
| GJ18140 | p38b   | 1     | 0.011 | 3  | 0.032 | 0.355    | Signaling | Kinase                |
| aop     | aop    | 1     | 0.005 | 3  | 0.015 | 0.355    | Signaling | Transcription factor  |
| GJ11480 | BG4    | 1     | 0.018 | 4  | 0.067 | 0.267    | Signaling | .                     |
| GJ19441 | SPE    | 3 *   | 0.033 | 15 | 0.155 | 0.213    | Signaling | Protease              |
| GJ22479 | Def    | 53 ** | 2.445 | 0  | 0     | Infinity | Effector  | Antimicrobial peptide |
| GJ21173 | AttC   | 47 ** | 0.818 | 0  | 0     | Infinity | Effector  | Antimicrobial peptide |

Supplementary Table 2 continued

|         |               |        |       |     |       |          |          |                           |
|---------|---------------|--------|-------|-----|-------|----------|----------|---------------------------|
| Cec2B   | CecA1 / CecA2 | 25 **  | 1.604 | 0   | 0     | Infinity | Effector | Antimicrobial peptide     |
| Cec3    | CecC          | 23 **  | 1.475 | 0   | 0     | Infinity | Effector | Antimicrobial peptide     |
| GJ22469 | Mtk           | 9 **   | 0.660 | 0   | 0     | Infinity | Effector | Antimicrobial peptide     |
| GJ22662 | AttD          | 5      | 0.113 | 0   | 0     | Infinity | Effector | Antimicrobial peptide     |
| GJ13808 | Tsf2          | 3      | 0.015 | 0   | 0     | Infinity | Effector | Iron binding              |
| GJ15754 | Jafrac1       | 2      | 0.042 | 0   | 0     | Infinity | Effector | Gut protection            |
| Ddc     | Ddc           | 2      | 0.016 | 0   | 0     | Infinity | Effector | Melanin synthesis cascade |
| GJ21181 | PO45          | 2      | 0.012 | 0   | 0     | Infinity | Effector | Phenoxidase               |
| Cec1    | CecC          | 1      | 0.064 | 0   | 0     | Infinity | Effector | Antimicrobial peptide     |
| GJ12891 | Jafrac2       | 1      | 0.017 | 0   | 0     | Infinity | Effector | Gut protection            |
| GJ14144 | Duox          | 1      | 0.003 | 0   | 0     | Infinity | Effector | Gut protection            |
| GJ19916 | Dpt           | 104 ** | 3.812 | 4   | 0.138 | 27.720   | Effector | Antimicrobial peptide     |
| GJ19917 | DptB          | 39 **  | 1.120 | 3   | 0.081 | 13.860   | Effector | Antimicrobial peptide     |
| GJ12507 | LysD          | 5      | 0.146 | 1   | 0.027 | 5.331    | Effector | Lysozyme, c-type          |
| GJ20571 | AttA          | 5      | 0.087 | 1   | 0.016 | 5.331    | Effector | Antimicrobial peptide     |
| GJ20572 | AttA          | 49 *   | 0.856 | 24  | 0.393 | 2.177    | Effector | Antimicrobial peptide     |
| GJ20545 | Pu            | 83     | 1.257 | 58  | 0.824 | 1.526    | Effector | Melanin synthesis cascade |
| GJ10563 | Irc           | 19     | 0.110 | 14  | 0.076 | 1.447    | Effector | Gut protection            |
| GJ11603 | Catsup        | 6      | 0.056 | 6   | 0.053 | 1.066    | Effector | Melanin synthesis cascade |
| GJ20669 | Tsf3          | 1      | 0.006 | 1   | 0.005 | 1.066    | Effector | Iron binding              |
| GJ21009 | CG6426        | 7      | 0.177 | 8   | 0.190 | 0.933    | Effector | Lysozyme, I-type          |
| GJ15168 | Tig           | 47     | 0.087 | 55  | 0.095 | 0.911    | Effector | Coagulation               |
| GJ10805 | yellow-f2     | 2      | 0.018 | 3   | 0.025 | 0.711    | Effector | Melanin synthesis cascade |
| GJ15366 | Tsf1          | 111    | 0.713 | 172 | 1.036 | 0.688    | Effector | Iron binding              |
| GJ17981 | fon           | 217 *  | 1.641 | 370 | 2.624 | 0.625    | Effector | Coagulation               |
| GJ21309 | IM10          | 22     | 0.257 | 37  | 0.405 | 0.634    | Effector | IM                        |

Supplementary Table 2 continued

|         |         |       |       |     |        |       |          |                               |
|---------|---------|-------|-------|-----|--------|-------|----------|-------------------------------|
| GJ18607 | IM4     | 79 *  | 7.542 | 151 | 13.521 | 0.558 | Effector | IM                            |
| GJ21008 | CG6426  | 2     | 0.051 | 4   | 0.095  | 0.533 | Effector | Lysozyme, I-type              |
| GJ21308 | IM10    | 23 *  | 0.350 | 51  | 0.727  | 0.481 | Effector | IM                            |
| GJ18065 | CG15293 | 9     | 0.069 | 22  | 0.159  | 0.436 | Effector | Coagulation                   |
| GJ13134 | CG14823 | 2     | 0.036 | 5   | 0.085  | 0.426 | Effector | Lysozyme, I-type; destabilase |
| GJ19885 | IM1     | 37 ** | 3.302 | 123 | 10.296 | 0.321 | Effector | IM                            |
| GJ18809 | CG16799 | 1     | 0.025 | 5   | 0.117  | 0.213 | Effector | Lysozyme, c-type              |
| GJ22454 | IM23    | 1     | 0.039 | 6   | 0.218  | 0.178 | Effector | IM                            |
| GJ12894 | LysD    | 1     | 0.029 | 7   | 0.187  | 0.152 | Effector | Lysozyme, c-type              |

Genes are shown in order of induction coefficient at each functional class.

\*, \*\* Significant difference from the number of reads for naïve larvae (\*  $P < 0.05$ , \*\*  $P < 0.01$ ).

Supplementary Table 3: Number of reads, trimmed mean of M value (TMM) and induction coefficient (IC) for recognition, signaling and effector class immune-related genes observed in *D. melanogaster*.

| <i>D. melanogaster</i><br>gene | Infected        |       | Naïve           |       | IC       | Functional<br>Class | Notes                      |
|--------------------------------|-----------------|-------|-----------------|-------|----------|---------------------|----------------------------|
|                                | No. of<br>reads | TMM   | No. of<br>reads | TMM   |          |                     |                            |
| PGRP-SB1                       | 29 **           | 0.779 | 0               | 0     | Infinity | Recognition         | PGRP domain                |
| PGRP-SC1b                      | 11 **           | 0.288 | 0               | 0     | Infinity | Recognition         | Amidase degradation        |
| PGRP-SB2                       | 9 **            | 0.225 | 0               | 0     | Infinity | Recognition         | PGRP domain                |
| Mcr                            | 4 *             | 0.011 | 0               | 0     | Infinity | Recognition         | Tep                        |
| GNBP2                          | 3               | 0.035 | 0               | 0     | Infinity | Recognition         | Beta-glucan binding domain |
| Sr-CIV                         | 2               | 0.024 | 0               | 0     | Infinity | Recognition         | Scavenger receptor         |
| nimB1                          | 1               | 0.013 | 0               | 0     | Infinity | Recognition         | Nimrod-related             |
| PGRP-SC1a                      | 1               | 0.030 | 0               | 0     | Infinity | Recognition         | Amidase degradation        |
| PGRP-SC2                       | 20 **           | 0.603 | 3               | 0.102 | 5.891    | Recognition         | Amidase degradation        |
| TepII                          | 188 **          | 0.708 | 31              | 0.132 | 5.359    | Recognition         | Tep                        |
| nimC2                          | 43 **           | 0.310 | 9               | 0.073 | 4.222    | Recognition         | Nimrod-related             |
| GNBP3                          | 15 **           | 0.164 | 4               | 0.049 | 3.313    | Recognition         | Beta-glucan binding domain |
| CG13422                        | 17 **           | 0.569 | 5               | 0.189 | 3.004    | Recognition         | Beta-glucan binding domain |
| TepIV                          | 37 **           | 0.131 | 13              | 0.052 | 2.515    | Recognition         | Tep                        |
| crq                            | 5               | 0.043 | 2               | 0.020 | 2.209    | Recognition         | Scavenger receptor         |
| PGRP-SA                        | 7               | 0.103 | 3               | 0.050 | 2.062    | Recognition         | PGRP domain                |
| TepI                           | 7               | 0.028 | 3               | 0.013 | 2.062    | Recognition         | Tep                        |
| PGRP-SD                        | 27 **           | 0.626 | 13              | 0.341 | 1.835    | Recognition         | PGRP domain                |
| modSP                          | 2               | 0.014 | 2               | 0.016 | 0.884    | Recognition         | Scavenger receptor         |
| PGRP-LC                        | 1               | 0.009 | 1               | 0.010 | 0.884    | Recognition         | PGRP domain                |
| PGRP-LE                        | 1               | 0.009 | 1               | 0.010 | 0.884    | Recognition         | PGRP domain                |
| pes                            | 1               | 0.007 | 1               | 0.007 | 0.884    | Recognition         | Scavenger receptor         |
| PGRP-LB                        | 1               | 0.013 | 1               | 0.015 | 0.884    | Recognition         | Amidase degradation        |
| nimB2                          | 24              | 0.279 | 29              | 0.382 | 0.731    | Recognition         | Nimrod-related             |
| nimB4                          | 4               | 0.045 | 5               | 0.064 | 0.707    | Recognition         | Nimrod-related             |
| nimB3                          | 24              | 0.898 | 44              | 1.864 | 0.482    | Recognition         | Nimrod-related             |
| CG30148                        | 1               | 0.026 | 2               | 0.058 | 0.442    | Recognition         | Beta-glucan binding domain |
| emp                            | 1               | 0.007 | 3               | 0.025 | 0.295    | Recognition         | Scavenger receptor         |
| Dcr-2                          | 3               | 0.009 | 2               | 0.007 | 1.325    | Other               | .                          |
| Rel                            | 14 **           | 0.067 | 0               | 0     | Infinity | Signaling           | Transcription factor       |
| aop                            | 6 **            | 0.026 | 0               | 0     | Infinity | Signaling           | Transcription factor       |
| brm                            | 5 *             | 0.016 | 0               | 0     | Infinity | Signaling           | Transcription factor       |



Supplementary Table 3 continued

|         |       |       |   |       |          |           |                       |
|---------|-------|-------|---|-------|----------|-----------|-----------------------|
| Myd88   | 4 *   | 0.019 | 0 | 0     | Infinity | Signaling | .                     |
| ush     | 3     | 0.008 | 0 | 0     | Infinity | Signaling | Transcription factor  |
| Mpk2    | 3     | 0.034 | 0 | 0     | Infinity | Signaling | Kinase                |
| ird5    | 3     | 0.020 | 0 | 0     | Infinity | Signaling | Kinase                |
| slpr    | 3     | 0.010 | 0 | 0     | Infinity | Signaling | .                     |
| lwr     | 3     | 0.045 | 0 | 0     | Infinity | Signaling | Protein modification  |
| hop     | 3     | 0.010 | 0 | 0     | Infinity | Signaling | Kinase                |
| Ulp1    | 3     | 0.010 | 0 | 0     | Infinity | Signaling | Protein modification  |
| tamo    | 2     | 0.009 | 0 | 0     | Infinity | Signaling | Nuclear transport     |
| Traf4   | 2     | 0.015 | 0 | 0     | Infinity | Signaling | .                     |
| Pvf2    | 1     | 0.008 | 0 | 0     | Infinity | Signaling | Ligand                |
| edl     | 1     | 0.011 | 0 | 0     | Infinity | Signaling | .                     |
| Dsor1   | 1     | 0.009 | 0 | 0     | Infinity | Signaling | Kinase                |
| mbo     | 1     | 0.007 | 0 | 0     | Infinity | Signaling | Nuclear transport     |
| Rac2    | 1     | 0.011 | 0 | 0     | Infinity | Signaling | .                     |
| CG6361  | 15 ** | 0.185 | 1 | 0.014 | 13.254   | Signaling | Protease              |
| cact    | 11 ** | 0.081 | 1 | 0.008 | 9.720    | Signaling | .                     |
| dom     | 8 *   | 0.085 | 1 | 0.012 | 7.069    | Signaling | Transcription factor  |
| Rac1    | 4     | 0.037 | 1 | 0.010 | 3.534    | Signaling | .                     |
| spz     | 4     | 0.033 | 1 | 0.010 | 3.534    | Signaling | Ligand                |
| Stat92E | 11 *  | 0.050 | 3 | 0.016 | 3.240    | Signaling | Transcription factor  |
| srp     | 18 ** | 0.080 | 5 | 0.025 | 3.181    | Signaling | Transcription factor  |
| phl     | 32 ** | 0.135 | 9 | 0.043 | 3.142    | Signaling | .                     |
| mask    | 10 *  | 0.012 | 3 | 0.004 | 2.945    | Signaling | .                     |
| spirit  | 22 ** | 0.231 | 7 | 0.083 | 2.777    | Signaling | Protease              |
| hep     | 6     | 0.031 | 2 | 0.012 | 2.651    | Signaling | Kinase                |
| emb     | 6     | 0.022 | 2 | 0.008 | 2.651    | Signaling | Nuclear transport     |
| Pvr     | 8     | 0.026 | 3 | 0.011 | 2.356    | Signaling | Receptor              |
| Sp7     | 13    | 0.112 | 6 | 0.059 | 1.914    | Signaling | Phenoloxidase cascade |
| ben     | 15    | 0.138 | 7 | 0.073 | 1.893    | Signaling | Protein modification  |
| Egfr    | 6     | 0.022 | 3 | 0.012 | 1.767    | Signaling | Receptor              |
| Stam    | 4     | 0.023 | 2 | 0.013 | 1.767    | Signaling | .                     |
| Ntf-2   | 4     | 0.022 | 2 | 0.012 | 1.767    | Signaling | Nuclear transport     |
| Hel89B  | 2     | 0.005 | 1 | 0.003 | 1.767    | Signaling | .                     |
| key     | 2     | 0.025 | 1 | 0.014 | 1.767    | Signaling | Kinase                |
| Mkk4    | 2     | 0.013 | 1 | 0.008 | 1.767    | Signaling | Kinase                |
| Dif     | 2     | 0.013 | 1 | 0.007 | 1.767    | Signaling | Transcription factor  |

Supplementary Table 3 continued

|             |        |        |    |        |          |           |                           |
|-------------|--------|--------|----|--------|----------|-----------|---------------------------|
| tub         | 2      | 0.017  | 1  | 0.009  | 1.767    | Signaling | .                         |
| imd         | 2      | 0.025  | 1  | 0.014  | 1.767    | Signaling | .                         |
| dome        | 3      | 0.010  | 2  | 0.008  | 1.325    | Signaling | Receptor                  |
| grass       | 3      | 0.038  | 2  | 0.029  | 1.325    | Signaling | Protease                  |
| nec         | 18     | 0.186  | 14 | 0.164  | 1.136    | Signaling | Protease                  |
| ref(2)P     | 10     | 0.075  | 8  | 0.068  | 1.104    | Signaling | .                         |
| SPE         | 7      | 0.093  | 6  | 0.090  | 1.031    | Signaling | Protease                  |
| MP1         | 9      | 0.101  | 9  | 0.114  | 0.884    | Signaling | Phenoloxidase cascade     |
| Jra         | 3      | 0.033  | 3  | 0.037  | 0.884    | Signaling | Transcription factor      |
| msn         | 2      | 0.006  | 2  | 0.007  | 0.884    | Signaling | Kinase                    |
| Iap2        | 1      | 0.008  | 1  | 0.009  | 0.884    | Signaling | .                         |
| Dredd       | 1      | 0.008  | 1  | 0.0010 | 0.884    | Signaling | Protease                  |
| ytr         | 1      | 0.008  | 1  | 0.009  | 0.884    | Signaling | .                         |
| Traf-like   | 1      | 0.007  | 1  | 0.008  | 0.884    | Signaling | .                         |
| kay         | 1      | 0.004  | 1  | 0.004  | 0.884    | Signaling | Transcription factor      |
| pnt         | 1      | 0.006  | 1  | 0.007  | 0.884    | Signaling | Transcription factor      |
| Uev1A       | 7      | 0.087  | 9  | 0.127  | 0.687    | Signaling | Protein modification      |
| psh         | 3      | 0.030  | 4  | 0.046  | 0.663    | Signaling | Protease                  |
| Spn27A      | 2      | 0.015  | 3  | 0.025  | 0.589    | Signaling | Phenoloxidase cascade     |
| Su(var)2-10 | 2      | 0.016  | 3  | 0.026  | 0.589    | Signaling | .                         |
| cher        | 4      | 0.019  | 7  | 0.038  | 0.505    | Signaling | .                         |
| smt3        | 3      | 0.068  | 9  | 0.229  | 0.295    | Signaling | Protein modification      |
| CecC        | 35 **  | 1.521  | 0  | 0      | Infinity | Effector  | Antimicrobial peptide     |
| CecA1       | 14 **  | 0.663  | 0  | 0      | Infinity | Effector  | Antimicrobial peptide     |
| Def         | 11 **  | 0.461  | 0  | 0      | Infinity | Effector  | Antimicrobial peptide     |
| CecB        | 7 **   | 0.288  | 0  | 0      | Infinity | Effector  | Antimicrobial peptide     |
| dro5        | 6 **   | 0.276  | 0  | 0      | Infinity | Effector  | Antimicrobial peptide     |
| Hml         | 2      | 0.003  | 0  | 0      | Infinity | Effector  | Coagulation               |
| CG18107     | 2      | 0.118  | 0  | 0      | Infinity | Effector  | IM                        |
| TotB        | 2      | 0.063  | 0  | 0      | Infinity | Effector  | Tot                       |
| CecA2       | 2      | 0.094  | 0  | 0      | Infinity | Effector  | Antimicrobial peptide     |
| Tsf3        | 1      | 0.007  | 0  | 0      | Infinity | Effector  | Iron binding              |
| AttC        | 252 ** | 4.684  | 2  | 0.042  | 111.333  | Effector  | Antimicrobial peptide     |
| Dpt         | 343 ** | 11.568 | 24 | 0.916  | 12.628   | Effector  | Antimicrobial peptide     |
| DptB        | 80 **  | 2.974  | 6  | 0.252  | 11.781   | Effector  | Antimicrobial peptide     |
| Pu          | 79 **  | 0.687  | 7  | 0.069  | 9.972    | Effector  | Melanin synthesis cascade |

Supplementary Table 3 continued

|          |        |        |     |        |       |          |                           |
|----------|--------|--------|-----|--------|-------|----------|---------------------------|
| TotC     | 10 **  | 0.311  | 1   | 0.035  | 8.836 | Effector | Tot                       |
| IM18     | 62 **  | 1.403  | 8   | 0.205  | 6.848 | Effector | IM                        |
| Mtk      | 380 ** | 23.719 | 52  | 3.673  | 6.457 | Effector | Antimicrobial peptide     |
| Dro      | 192 ** | 4.237  | 27  | 0.674  | 6.283 | Effector | Antimicrobial peptide     |
| Jafrac1  | 5      | 0.083  | 1   | 0.019  | 4.418 | Effector | Gut protection            |
| yellow-f | 23 **  | 0.277  | 6   | 0.082  | 3.387 | Effector | Melanin synthesis cascade |
| IM14     | 68 **  | 5.101  | 19  | 1.613  | 3.162 | Effector | IM                        |
| AttA     | 96 **  | 2.113  | 27  | 0.673  | 3.142 | Effector | Antimicrobial peptide     |
| IM4      | 56 **  | 2.194  | 16  | 0.709  | 3.093 | Effector | IM                        |
| IM10     | 355 ** | 6.147  | 116 | 2.273  | 2.704 | Effector | IM                        |
| IM1      | 247 ** | 11.541 | 82  | 4.336  | 2.662 | Effector | IM                        |
| AttB     | 74 **  | 1.428  | 27  | 0.590  | 2.422 | Effector | Antimicrobial peptide     |
| IM2      | 139 ** | 6.250  | 62  | 3.155  | 1.981 | Effector | IM                        |
| Tsf1     | 145 ** | 1.209  | 68  | 0.642  | 1.884 | Effector | Iron binding              |
| IM23     | 6      | 0.216  | 3   | 0.122  | 1.767 | Effector | IM                        |
| TotA     | 182 ** | 5.213  | 98  | 3.177  | 1.641 | Effector | Tot                       |
| Drs      | 551 ** | 23.817 | 299 | 14.627 | 1.628 | Effector | Antimicrobial peptide     |
| Tig      | 22 **  | 0.053  | 12  | 0.033  | 1.620 | Effector | Coagulation               |
| CG15293  | 9      | 0.126  | 5   | 0.079  | 1.590 | Effector | Coagulation               |
| IM3      | 330 ** | 18.401 | 188 | 11.864 | 1.551 | Effector | IM                        |
| CG33470  | 9      | 0.167  | 6   | 0.126  | 1.325 | Effector | IM                        |
| Irc      | 26     | 0.182  | 22  | 0.174  | 1.044 | Effector | Gut protection            |
| CG16799  | 7      | 0.164  | 10  | 0.265  | 0.619 | Effector | Lysozyme, c-type          |
| fon      | 80     | 0.696  | 121 | 1.192  | 0.584 | Effector | Coagulation               |
| Catsup   | 2      | 0.018  | 8   | 0.082  | 0.221 | Effector | Melanin synthesis cascade |

Genes are shown in order of induction coefficient at each functional class.

\*, \*\* Significant difference from the number of reads for naïve larvae (\*  $P < 0.05$ , \*\*  $P < 0.01$ ).

Supplementary Table 4: Number of reads, induction coefficient (IC) and predicted function of the putative genes (PG) in *D. virilis*.

| Putative gene | No. of reads |       | IC       | Swissprot<br>ID | Definition                                         | Organism                       | Immune-related |
|---------------|--------------|-------|----------|-----------------|----------------------------------------------------|--------------------------------|----------------|
|               | Infected     | Naïve |          |                 |                                                    |                                |                |
| PG00034       | 17           | 37    | 0.48     | P83869          | Immune-induced peptide 14                          | <i>Drosophila melanogaster</i> | +              |
| PG00098       | 1131         | 814   | 1.44     | A7Y3K2          | Putative membrane protein ycf1                     | <i>Ipomoea purpurea</i>        | -              |
| PG00273       | 32           | 15    | 2.22     | P05389          | 60S acidic ribosomal protein P2                    | <i>Drosophila melanogaster</i> | -              |
| PG00326       | 13           | 4     | 3.38     | P29742          | Clathrin heavy chain                               | <i>Drosophila melanogaster</i> | -              |
| PG00604       | 11           | 1     | 11.44    | P60892          | Ribose-phosphate pyrophosphokinase 1               | <i>Rattus norvegicus</i>       | -              |
| PG00667       | 17           | 5     | 3.53     | P61255          | 60S ribosomal protein L26                          | <i>Mus musculus</i>            | -              |
| PG00683       | 17           | 54    | 0.33     | P61210          | ADP-ribosylation factor 1                          | <i>Locusta migratoria</i>      | -              |
| PG01080       | 36           | 86    | 0.43     | O44390          | Acyl-CoA Delta(11) desaturase                      | <i>Trichoplusia ni</i>         | -              |
| PG01083       | 12           | 0     | Infinity | P54385          | Glutamate dehydrogenase, mitochondrial             | <i>Drosophila melanogaster</i> | -              |
| PG01215       | 53           | 122   | 0.45     | P07701          | Salivary glue protein Sgs-5                        | <i>Drosophila melanogaster</i> | -              |
| PG01259       | 21           | 7     | 3.12     | P02553          | Tubulin alpha chain (Fragment)                     | <i>Lytechinus pictus</i>       | -              |
| PG01319       | 15           | 0     | Infinity | P23194          | Uricase                                            | <i>Drosophila virilis</i>      | -              |
| PG01327       | 8            | 1     | 8.32     | Q7KN62          | Transitional endoplasmic reticulum ATPase TER94    | <i>Drosophila melanogaster</i> | -              |
| PG01341       | 10           | 0     | Infinity | P79398          | Eukaryotic translation initiation factor 4 gamma 2 | <i>Oryctolagus cuniculus</i>   | -              |
| PG01370       | 1            | 14    | 0.074    | Q03168          | Lysosomal aspartic protease                        | <i>Aedes aegypti</i>           | -              |
| PG01376       | 2            | 11    | 0.19     | Q962Q6          | 40S ribosomal protein S24                          | <i>Spodoptera frugiperda</i>   | -              |
| PG01460       | 62           | 27    | 2.39     | P31403          | V-type proton ATPase 16 kDa proteolipid subunit    | <i>Manduca sexta</i>           | -              |
| PG01494       | 17           | 4     | 4.42     | P20007          | Phosphoenolpyruvate carboxykinase [GTP]            | <i>Drosophila melanogaster</i> | -              |
| PG01518       | 1            | 8     | 0.13     | Q8T8R1          | CCHC-type zinc finger protein CG3800               | <i>Drosophila melanogaster</i> | -              |
| PG01778       | 7            | 0     | Infinity | P48148          | Ras-like GTP-binding protein Rho1                  | <i>Drosophila melanogaster</i> | +              |
| PG01865       | 55           | 105   | 0.54     | P54361          | Ornithine decarboxylase antizyme                   | <i>Drosophila melanogaster</i> | -              |
| PG01979       | 18           | 39    | 0.48     | P02707          | Hepatic lectin                                     | <i>Gallus gallus</i>           | -              |
| PG01980       | 15           | 0     | Infinity | P11997          | Larval serum protein 1 gamma chain                 | <i>Drosophila melanogaster</i> | -              |

Supplementary Table 4 continued

---

|         |    |    |          |        |                                                     |                                |   |
|---------|----|----|----------|--------|-----------------------------------------------------|--------------------------------|---|
| PG02420 | 2  | 10 | 0.21     | Q5I2E5 | Ficolin-2                                           | <i>Bos taurus</i>              | + |
| PG02437 | 10 | 30 | 0.35     | Q9GPH3 | Activating transcription factor of chaperone        | <i>Bombyx mori</i>             | - |
| PG03038 | 46 | 22 | 2.17     | Q9NJH0 | Elongation factor 1-gamma                           | <i>Drosophila melanogaster</i> | - |
| PG03151 | 6  | 0  | Infinity | P60517 | Gamma-aminobutyric acid receptor-associated protein | <i>Rattus norvegicus</i>       | - |

---

Supplementary Figure 1

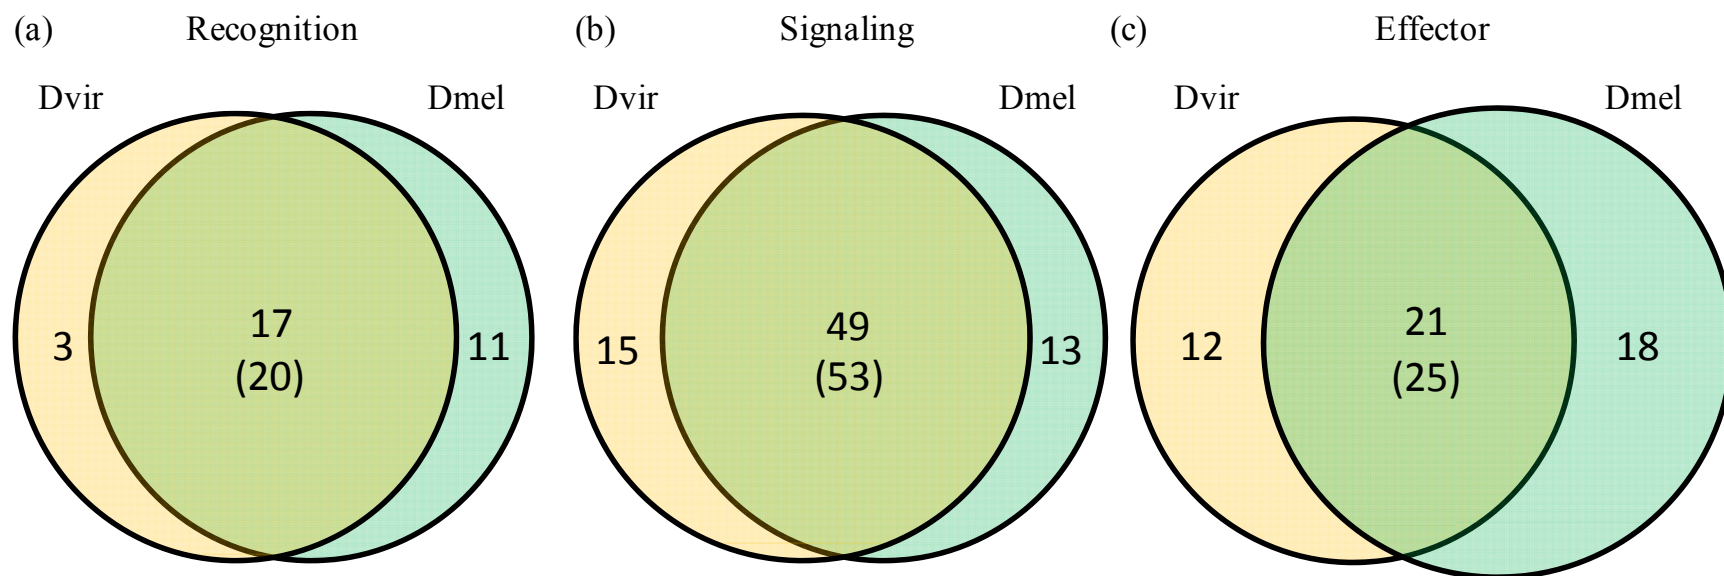

Supplement: f1 [file 542139.f1.pdf]
